1 **Antagonistic coevolution between multiple quantitative traits:**

2 **Matching dynamics can arise from difference interactions**

3 Masato Yamamichi<sup>1,\*</sup>, Kelsey Lyberger<sup>2</sup>, Swati Patel<sup>3</sup>

4

5 1) Department of General Systems Studies, University of Tokyo, Tokyo, Japan

6 2) Department of Evolution and Ecology, University of California, Davis, Davis, California

7 3) Department of Mathematics, Tulane University, New Orleans, Louisiana

8 \*Corresponding author: [c-yamamichi@mail.ecc.u-tokyo.ac.jp](mailto:c-yamamichi@mail.ecc.u-tokyo.ac.jp)

9

10 **ABSTRACT**

11 Coevolution is one of the major drivers of complex dynamics in population ecology. Historically,  
12 antagonistic coevolution in victim-exploiter systems has been a topic of special interest, and  
13 involves traits with various genetic architectures (e.g., the number of genes involved) and effects  
14 on interactions. For example, exploiters may need to have traits that “match” those of victims for  
15 successful exploitation (i.e., a matching interaction), or traits that exceed those of victims (i.e., a  
16 difference interaction). Different models exist which are appropriate for different types of traits,  
17 including Mendelian (discrete) and quantitative (continuous) traits. For models with multiple  
18 Mendelian traits, recent studies have shown that antagonistic coevolutionary patterns that appear  
19 as matching interactions can arise due to multiple difference interactions with costs of having  
20 large trait values. Here we generalize their findings to quantitative traits and show, analogously,  
21 that the multidimensional difference interactions with costs sometimes behave qualitatively the

22 same as matching interactions. While previous studies in quantitative genetics have used the  
23 dichotomy between matching and difference frameworks to explore coevolutionary dynamics, we  
24 suggest that exploring multidimensional trait space is important to examine the generality of  
25 results obtained from one-dimensional traits.

26

27 **Keywords:** bidirectional axis of vulnerability, fluctuating selection, gene-for-gene,  
28 matching allele, unidirectional axis of vulnerability

## 29 INTRODUCTION

30 Theories developed from specific models are initially only as general as their underlying models,  
31 until they are shown to hold in other modeling frameworks. Hence, it is critical to compare  
32 results from a variety of modeling frameworks to test their generality. Antagonistic coevolution  
33 in victim-exploiter systems (e.g., prey-predator or host-pathogen systems) has been intensively  
34 studied theoretically (Abrams, 2000; Nuismer, 2017). It is thought to be a major driver for the  
35 emergence and maintenance of biodiversity (Thompson, 2005) and feedbacks between interacting  
36 species can create complex ecological (e.g., Cortez and Weitz, 2014) and evolutionary (e.g.,  
37 Dercole et al., 2010) dynamics. Historically, various coevolution models with differing genetic  
38 architectures (e.g., the number of genes involved) and interspecific interactions (e.g., a “matching”  
39 vs. a “difference” interaction: see below) have been proposed and analyzed (Nuismer, 2017). To  
40 account for genetic architecture, one approach is to consider coevolution with a few major genes  
41 that interact and produce a discrete phenotype (Mendelian trait-based models, or hereafter  
42 Mendelian models) (e.g., Mode, 1958; Seger, 1988). On the other hand, quantitative trait-based  
43 models (hereafter quantitative models) assume the genetic architecture consists of many genes of  
44 small effect and produce continuous phenotypes (e.g., Gavrillets, 1997; Saloniemi, 1993).

45           Here we highlight the connection between Mendelian and quantitative models of  
46 victims and exploiters, and then clarify the relationships between existing modeling frameworks  
47 for quantitative traits. We begin by reviewing the different modeling frameworks for Mendelian  
48 traits. We then draw analogies between Mendelian and quantitative models (e.g., Boots et al.,  
49 2014; Cortez and Weitz, 2014). The analogies suggest that the matching framework, in which  
50 exploitation is more successful when traits “match” (i.e., a bidirectional axis of vulnerability  
51 *sensu* Abrams 2000), can arise from the difference framework, in which exploitation is more  
52 successful when traits differ (i.e., a unidirectional axis of vulnerability *sensu* Abrams 2000), in  
53 multidimensional quantitative models with costs of having large trait values. Finally, as a proof  
54 of concept, we give an example model of theoretical quantitative genetics where a  
55 victim-exploiter coevolutionary dynamics arising from two pairs of difference traits can appear as  
56 a matching interaction in a single pair of traits.

57

## 58 **BACKGROUND**

59           Historically, in Mendelian models, two major interactions were often assumed and  
60 contrasted: the matching allele (MA) framework, in which exploitation is successful when traits

61 match (e.g., Grosberg and Hart, 2000) (Figure 1a), and the gene-for-gene (GFG) framework, in  
62 which a generalist exploiter can exploit a range of victim genotypes, but pays a cost for  
63 generalism (Flor, 1956) (Figure 1c). Researchers have investigated the relative importance and  
64 relationships of the two interactions (e.g., Agrawal and Lively, 2002; Frank, 1996; Parker, 1994).  
65 Recently, Ashby and Boots (2017) found that, in multidimensional Mendelian (multilocus)  
66 models, the GFG framework can behave effectively as the MA framework (Figure 2a).

67 To illustrate, consider a simple GFG model with haploid victims and exploiters with  
68 two loci with two alleles each, labelled 1 and 0. The alleles 1 and 0 indicate the presence and  
69 absence, respectively, of an exploitation or defense trait (Figure 2a). If both of the allelic values  
70 of the exploiter are greater than or equal to those of the victim, maximum exploitation will occur  
71 (black squares in Figure 2a). If the victim has exactly one allelic value greater than that of the  
72 exploiter, so that the other allelic value of the victim is less than or equal to the corresponding  
73 value of the exploiter, then exploitation will be partial (gray squares in Figure 2a). Finally, in the  
74 case where both allelic values of the victim are strictly greater than that of the exploiter (which  
75 only occurs when the victim has genotype 11 and the exploiter has 00), then the victim is  
76 defended against exploitation (a white square in Figure 2a).

77           When coevolutionary dynamics occurs between four genotypes with the alleles 1 and 0,  
78 the type of interaction (indicated by a dashed white line in Figure 2a) effectively reduces to a MA  
79 interaction: the exploiter genotype 01 (10) is more successful at exploiting its matching counter  
80 victim genotype 01 (10) as in Figure 1a. Indeed, by investigating a multilocus GFG model,  
81 Ashby and Boots (2017) found that, in the case where an intermediate number of alleles is  
82 optimal, the victim/exploiter genotypes alternate between various subsets of defense/exploitation  
83 alleles, but the total number of alleles stays constant. Hence, the multidimensional GFG  
84 framework effectively behaves as the MA framework (Figure 2a).

85           As with Mendelian models, quantitative models have assumed an apparent dichotomy  
86 between two frameworks (Abrams, 2000; Abrams and Matsuda, 1997; Gilman et al., 2012;  
87 McPeck, 2017): the matching trait framework, in which exploitation is increasingly more  
88 successful with the extent that trait values of exploiters match those of victims (Figure 1b), and  
89 the difference trait framework, in which exploitation is increasingly more successful with the  
90 extent that trait values of exploiters exceed those of victims (Figure 1d). They are also known as  
91 the bidirectional and unidirectional trait cases, respectively (Abrams, 2000). The matching  
92 framework is analogous to the MA model and is used, for example, when an exploiter can best

93 exploit a victim with body size or color within a certain range (Brown and Vincent, 1992;  
94 Calcagno et al., 2010; Dercole et al., 2010; Dieckmann et al., 1995; Fleischer et al., 2018;  
95 Gavrilets, 1997; Khibnik and Kondrashov, 1997; Kopp and Gavrilets, 2006; Marrow et al., 1992;  
96 Mougi, 2012; Nuismer et al., 2005; Yamamichi and Ellner, 2016). This has been observed in the  
97 coevolution between the African tawny-flanked prinia and its brood parasite, the cuckoo finch:  
98 the parasite varies its egg color to match that of the victim (Spottiswoode and Stevens, 2012). On  
99 the other hand, the difference framework is analogous to the GFG model and is appropriate when  
100 exploitation success is determined by speed vs. speed, strength vs. armor, or toxicity vs.  
101 resistance (Cortez and Weitz, 2014; Frank, 1994; Mougi and Iwasa, 2010; Mougi and Iwasa,  
102 2011; Northfield and Ives, 2013; Nuismer et al., 2007; Saloniemi, 1993; Sasaki and Godfray,  
103 1999; Tien and Ellner, 2012; van Velzen and Gaedke, 2017; Yamamichi and Miner, 2015). For  
104 example, garter snakes evolve stronger resistance to rough-skinned newt toxicity in areas where  
105 newts are more toxic (Brodie III and Brodie Jr, 1990).

106 In the matching framework, exploitation success is typically a unimodal function of the  
107 trait difference, and is often modeled as a Gaussian:  $\exp[-(x - y)^2]$ , where  $x$  and  $y$  are traits of  
108 victims and exploiters, respectively (Figure 1b) (e.g., Gavrilets, 1997; Khibnik and Kondrashov,

109 1997; Mougi, 2012; Nuismer et al., 2005). On the other hand, in the difference framework,  
110 exploitation success is often modeled as a sigmoidal function of the trait difference:  $1/[1 + \exp(x$   
111  $- y)]$  (Figure 1d) (e.g., Mougi and Iwasa, 2010; Nuismer et al., 2007; van Velzen and Gaedke,  
112 2017). In this framework, it is always advantageous for both species to increase the trait values  
113 for better exploitation/defense (McPeck, 2017). Empirical evidence suggests that there is an  
114 energetic trade-off to exploitation and defense and hence, most models of difference traits assume  
115 there is a cost associated with each trait, which prevents runaway evolution. For example, garter  
116 snakes resistant to newt toxin have costs associated with slower sprinting speeds (Brodie III and  
117 Brodie Jr, 1999), milkweed bugs' production of enzymes to break down milkweed toxins has  
118 metabolic costs (Dalla and Dobler, 2016), and numerous plants produce defense chemicals with a  
119 cost to plant growth (reviewed in Herms and Mattson, 1992).

120           Here, by drawing analogies between the Mendelian trait and quantitative trait  
121 frameworks (Figure 1), we further extend the generalization of Ashby and Boots (2017) and  
122 demonstrate that the difference framework can result in similar dynamics to the matching  
123 framework in multidimensional quantitative models. The matching model is a continuous trait  
124 analog to the MA model and the difference model is a continuous trait analog to the GFG model



125 (Figure 1). In a multilocus GFG model, under certain conditions the victim/exploiter genotypes  
126 alternate between various subsets of defense/exploitation alleles, but the total number of alleles  
127 stays constant, which is effectively what occurs under the MA framework (Ashby & Boots 2017).  
128 This is analogous to a bivariate difference trait model, in which the victim/exploiter genotypes  
129 alternate between having more investment in one defense/exploitation trait vs. another, which is  
130 effectively what occurs under the matching framework. Instead of switching between the  
131 extremes of a single matching trait, the species are switching between two difference-trait-based  
132 strategies. We consider a victim-exploiter model in which each has two difference traits that  
133 influence exploitation success. An empirical example that motivates our study is a stepwise  
134 infection process (Hall et al., 2017), where host species prevent exploitation of parasites by  
135 several difference traits. In the case where intermediate trait values are optimal due to the costs of  
136 defense/offense, the victim/exploiter traits may switch between combinations where a trait is  
137 large while the other trait is small, but the total costs stay constant. The resultant dynamics may  
138 appear as the matching interaction, and this is the quantitative-model analog to the findings in  
139 Ashby and Boots (2017) in Mendelian models.

140

141 **AN EXAMPLE**

142 We develop a two-dimensional quantitative model with difference interactions (Figure  
143 2b) to demonstrate that matching dynamics can emerge from a multidimensional difference  
144 framework (see Appendix S1 and Supplementary Mathematica file, Supporting Information, for  
145 details). We consider a quantitative genetic model (Iwasa et al., 1991; Lande, 1976) in continuous  
146 time (i.e., Malthusian fitness) (Abrams et al., 1993). We assume that victims and exploiters each  
147 have two quantitative traits. We let  $x_i$  be the value of victim trait  $i$  ( $= 1, 2$ ) and assume greater  
148 values allow for defense against trait  $i$  of the exploiter. We let  $y_i$  be the value of exploiter trait  $i$   
149 and assume greater values allow for more exploitation. Each trait is associated with a cost that  
150 decreases individual fitness with greater trait values. The difference between the exploiter trait  
151 and the corresponding victim trait,  $y_i - x_i$ , affects exploitation success (Figure 2b), which is  
152 expressed by a sigmoid function (Figure 1d). We assume that fitness of victims and exploiters are,  
153 respectively,

154

155

$$\begin{aligned} m_x &= r(x_1, x_2) - a_0 \prod_{i=1}^2 \frac{1}{1 + \exp[-\theta_i(y_i - x_i)]}, \\ m_y &= c(y_1, y_2) a_0 \prod_{i=1}^2 \frac{1}{1 + \exp[-\theta_i(y_i - x_i)]}, \end{aligned} \tag{1}$$

156  
157 where  $a_0$  is the effects of successful exploitation on fitness (e.g., maximum attacking rate), and  $\theta_i$   
158 ( $i = 1, 2$ ) determine the sensitivity of exploitation success to the trait difference. In our model, the  
159 product  $\prod_{i=1}^2 1/\{1 + \exp[-\theta_i(y_i - x_i)]\}$  means that victims need to overcome their exploiters at  
160 only one trait for escaping from exploitation, whereas exploiters must overcome the two defense  
161 traits for successful exploitation (Gilman et al. 2012). This sequential interaction is also found in  
162 many host-parasite systems (Hall et al. 2017).

163 Here  $r$  and  $c$  represent costs of defense and exploitation for victims and exploiters,  
164 respectively (e.g., prey growth and predator conversion efficiency are decreasing functions of  
165 defense and offense, respectively: see Appendix S1, Supporting Information), and they are  
166 linearly decreasing functions of the sum of the two traits values (i.e., lower values of  $r$  and  $c$   
167 represent higher costs). The costs can prevent escalation toward positive infinite values in the two  
168 traits. However, the two-dimensional difference model with costs behaves like a one-dimensional  
169 matching model, in which runaway evolution occurs toward a positive infinite value in one trait  
170 and a negative infinite value in the other trait (Appendices S2, S3, Figures S1, S2, Supporting  
171 Information). To prevent this, we add stabilizing selection to the victim cost function as in

172 Gavrilets (1997). This can occur in quantitative models but not in Mendelian models because it is  
173 customary to assume unbounded trait values in quantitative models, which permits the existence  
174 of runaway escalation, whereas Mendelian traits are typically modeled as taking values in finite  
175 sets. We employ the following functions:

176

$$\begin{aligned} 177 \quad r &= r_0 \left( 1 - \sum_{i=1}^2 \rho_{xi} x_i \right) \exp \left[ - \sum_{i=1}^2 s_i (x_i - x_{i0})^2 \right], \\ c &= c_0 \left( 1 - \sum_{i=1}^2 \rho_{yi} y_i \right), \end{aligned} \quad (2)$$

178

179 where  $r_0$  and  $c_0$  are basic parameter values (e.g., for prey growth rate and predator conversion  
180 efficiency) and  $\rho_{ij}$  ( $i = x, y, j = 1, 2$ ) determine the slope of the functions. Stabilizing selection  
181 drives victim evolution toward  $(x_1, x_2) = (x_{10}, x_{20})$ , where  $s_i$  ( $i = 1, 2$ ) determines the strength of  
182 stabilizing selection (Figure S3, Supporting Information). Note that adding stabilizing selection  
183 to the exploiter function instead of the victim function results in victim's escape from  
184 exploitation. We can add stabilizing selection to the exploiter function in addition to the victim  
185 function, but here we keep the model as simple as possible.

186

Then coevolutionary dynamics are described by four ordinary differential equations,

187

$$\frac{d}{dt} \begin{pmatrix} x_1 \\ x_2 \end{pmatrix} = \begin{pmatrix} v_{x11} & v_{x12} \\ v_{x12} & v_{x22} \end{pmatrix} \begin{pmatrix} \frac{\partial m_x}{\partial x_1} \\ \frac{\partial m_x}{\partial x_2} \end{pmatrix},$$

188

$$\frac{d}{dt} \begin{pmatrix} y_1 \\ y_2 \end{pmatrix} = \begin{pmatrix} v_{y11} & v_{y12} \\ v_{y12} & v_{y22} \end{pmatrix} \begin{pmatrix} \frac{\partial m_y}{\partial y_1} \\ \frac{\partial m_y}{\partial y_2} \end{pmatrix},$$

(3)

189

190 where  $v_{ijj}$  ( $i = x, y, j = 1, 2$ ) represents additive genetic variance,  $v_{i12}$  ( $i = x, y$ ) represents  
191 covariance, and partial derivatives represent fitness gradients (Abrams et al., 1993). For  
192 simplicity, we assume that the traits evolve independently (genetic covariance,  $v_{i12}$ , is zero). For  
193 example, this is likely in hosts that defend against parasites by a cellular immune response and a  
194 behavioral response, but further work is needed to explore the effects of trait correlations. Also,  
195 our trait symmetry assumptions (i.e., the additive genetic variances are the same,  $v_{i11} = v_{i22}$ , and  
196 the two traits affect exploitation success and fitness costs in the same way,  $\theta_1 = \theta_2$ ,  $\rho_{x1} = \rho_{x2}$ ,  $\rho_{y1} =$   
197  $\rho_{y2}$ , and  $s_1 = s_2$ ) should be carefully examined in future studies as this assumption may not hold  
198 for most traits (Figure S4, Supporting Information), and it may result in, for example, time-scale  
199 separation in evolutionary dynamics of the two traits.

200 By numerically solving the model, we find that the two-dimensional difference model  
201 can behave as a one-dimensional matching model. First, when there is no stabilizing selection in  
202 the victim cost ( $s_i = 0$ ) and the exploiter genetic variance is small enough ( $v_{xii} \gg v_{yii}$ ,  $i = 1, 2$ ),  
203 coevolutionary dynamics shows runaway escalation toward extreme trait values, and the  
204 coevolutionary outcome depends on initial conditions (Figure S2, Supporting Information).  
205 Second, when there is stabilizing selection ( $s_i > 0$ ) and the exploiter genetic variance is large  
206 enough (e.g.,  $v_{xii} < v_{yii}$ ), the system is attracted to a stable equilibrium (the blue and red points in  
207 Figures 3a, 3b), and there is disruptive selection for victim traits (i.e., fitness minimum: vectors  
208 representing fitness gradients in Figure 3a are distracted from the equilibrium) and stabilizing  
209 selection for exploiter traits (i.e., fitness maximum: vectors in Figure 3b are attracted to the  
210 equilibrium), which is consistent with the matching interaction (Appendix S2, Supporting  
211 Information) (Abrams and Matsuda, 1997; Gavrillets, 1997). Third, when there is stabilizing  
212 selection ( $s_i > 0$ ) and the exploiter genetic variance is small enough ( $v_{xii} \gg v_{yii}$ ), the equilibrium  
213 is not stable (Appendix S3, Figure S3, Supporting Information) and the trait dynamics fluctuate  
214 (Figure 3c) but are constrained to regions in which the total investments are nearly constant  
215 (Figure 3d) and the two traits for each species show antiphase cycles (Figures 3c, 3e, 3f). These

216 simulation results demonstrate that the matching dynamics can arise from the difference  
217 interaction, generalizing Ashby and Boots (2017)'s idea from Mendelian models to quantitative  
218 models.

219

## 220 **DISCUSSION**

221           Victim-exploiter interactions are among the most fundamental type of ecological  
222 interactions. In addition to their importance in ecological communities, these interactions are  
223 widely recognized for playing an important role in ecological dynamics (e.g., extinction and  
224 predator-prey cycles: Cortez and Weitz (2014); Northfield and Ives (2013)) and evolutionary  
225 dynamics (e.g., sex, recombination, and epistasis: Otto and Lenormand (2002)), because each  
226 species needs to continue to adapt to new selection pressures by the other species. Due to its  
227 importance, many modeling frameworks have been proposed to investigate the dynamics of  
228 coevolution between a victim and its exploiter, capturing various aspects of the traits  
229 involved (Nuismer, 2017).

230           In this work, we highlight the relationship between two modeling frameworks of  
231 quantitative traits in victim-exploiter coevolution. In particular, a multidimensional difference

232 trait framework, in which each trait confers an advantage in the victim-exploiter interaction but is  
233 associated with some cost (Figures 1d, 2b) can generate dynamics like a matching trait  
234 framework, in which traits between a victim and exploiter must “match” in some sense for  
235 successful interactions (Figure 1b). Our investigation extends our knowledge of the  
236 coevolutionary process by demonstrating how effectively matching dynamics can be generated  
237 from difference traits with costs in a special case of multivariate coevolution as a proof of  
238 concept (rather than a thorough investigation of the dynamics: Figure 3).

239           For some traits, the distinction between matching traits and difference traits is clear.  
240 For both victims and exploiters, being stronger and faster are always more advantageous (but  
241 may have an associated cost or energetic limitation) and hence, are difference traits. However, in  
242 other cases, it is not so obvious. For example, body size of both victims and exploiters can be a  
243 difference trait, in which bigger is better for exploitation/defense (e.g., gape-limited predation), or  
244 a matching trait, in which exploiters must be within a certain size range depending on victims’  
245 size for successful exploitation. Besides classifying difference vs. matching traits, a second  
246 empirical difficulty arises when not all traits are simultaneously measured. Our simulations  
247 suggest that, even when the body size is a difference trait, it may behave as a matching trait



248 because of another potentially unmeasured difference trait such as toxicity/resistance. This  
249 correlated coevolution between the two traits can occur even without genetic covariance, as long  
250 as the body size and toxicity/resistance affect exploitation success and the costs of being big  
251 affect fitness together with the costs of the toxicity/resistance.

252           Previous work has suggested that matching traits are more likely to lead to  
253 coevolutionary cycling of traits than difference interactions (Abrams, 2000; McPeck, 2017). In  
254 comparing quantitative models with a one-dimensional trait, for example, McPeck (2017) found  
255 cycles are observed in a smaller area of parameter space with difference traits compared to  
256 matching traits. Furthermore, the underlying mechanism of cycles differs in the two frameworks.  
257 In the matching framework, cycles consist of the exploiter tracking victim traits and the victim  
258 escaping from exploiter traits (i.e., fluctuating selection between equally specific  
259 defense/exploitation traits). In the difference framework, cycles consist of the victim and  
260 exploiter investing more energy in their traits for better defense/exploitation, and then  
261 abandoning their defense/exploitation because at some point they are too costly to maintain (i.e.,  
262 fluctuating selection between strong and weak defense/exploitation traits). Even when empirical  
263 researchers are focusing on a single trait with the difference interaction, the system may have

264 another difference trait that can affect exploitation success. In such a case, coevolutionary  
265 dynamics can be driven by the matching-like interaction, which may cause cyclic dynamics more  
266 easily (McPeck, 2017).

267           In spite of recent interest in coevolution in multidimensional trait space (e.g., Débarre  
268 et al., 2014; Doebeli and Ispolatov, 2017; Gilman et al., 2012), the relation of the matching and  
269 difference frameworks has not been well recognized. For example, in their study on evolutionary  
270 escape, Gilman et al. (2012) contrasted coevolutionary dynamics with matching and difference  
271 interactions in multidimensional trait space but did not find a significant difference between them  
272 (see Figure 1 of Gilman et al. (2012)). Our generalization offers a potential explanation for this  
273 previous work, as coevolutionary dynamics with matching interactions can arise from difference  
274 interactions in multidimensional quantitative models.

275           This work was inspired by the recent work of Ashby and Boots (2017), who showed an  
276 analogous relationship for two Mendelian trait models of coevolution. Here, we draw out the  
277 parallels between two Mendelian (single-locus) trait frameworks and two quantitative trait  
278 frameworks. Namely, we highlight that the matching allele (MA) framework is a Mendelian  
279 analog of the matching framework, and the gene-for-gene (GFG) framework is a Mendelian

280 analog of the difference framework (Figure 1). While these frameworks are valuable, many traits  
281 important to victim-exploiter interactions may actually lie somewhere in the middle of these two  
282 extremes; they may be determined by many (but not infinite number of) loci. It is still not well  
283 understood how coevolutionary dynamics differ between when traits are governed by a single  
284 locus, multi-locus (with linkage disequilibrium and epistasis), and effectively infinite loci (as  
285 assumed in classical quantitative genetics). While there have been a handful of papers to  
286 investigate this question in specific scenarios, further investigation is need for a general  
287 understanding.

288

## 289 **ACKNOWLEDGEMENTS**

290 We thank two anonymous reviewers, P. A. Abrams, M. H. Cortez, B. Ashby, and M. Boots for  
291 helpful comments. M.Y. was supported by the Japan Society for the Promotion of Science (JSPS)  
292 Grant-in-Aid for Scientific Research (KAKENHI) 15H02642, 16K18618, 16H04846, 18H02509,  
293 and 19K16223, and by John Mung Program and Hakubi Center for Advanced Research of Kyoto  
294 University. K.L. was supported by National Science Foundation (NSF) Grant DMS-1313418 to S.  
295 J. Schreiber at the University of California, Davis. S.P. was supported by the Austrian Science  
296 Fund (FWF) Grant P25188-N25 to R. Bürger at the University of Vienna.

297

## 298 **REFERENCES**

299 Abrams, P. A. (2000) The evolution of predator-prey interactions: Theory and evidence. Annual  
300 Review of Ecology and Systematics 31: 79-105. DOI 10.1146/annurev.ecolsys.31.1.79.  
301 Abrams, P. A. & Matsuda, H. (1997) Fitness minimization and dynamic instability as a

- 302 consequence of predator-prey coevolution. *Evolutionary Ecology* 11: 1-20. DOI  
303 10.1023/a:1018445517101.
- 304 Abrams, P. A., Matsuda, H. & Harada, Y. (1993) Evolutionarily unstable fitness maxima and  
305 stable fitness minima of continuous traits. *Evolutionary Ecology* 7: 465-487. DOI  
306 10.1007/BF01237642.
- 307 Agrawal, A. & Lively, C. M. (2002) Infection genetics: gene-for-gene versus matching-alleles  
308 models and all points in between. *Evolutionary Ecology Research* 4: 79-90.
- 309 Ashby, B. & Boots, M. (2017) Multi-mode fluctuating selection in host–parasite coevolution.  
310 *Ecology Letters* 20: 357-365. DOI 10.1111/ele.12734.
- 311 Boots, M., White, A., Best, A. & Bowers, R. (2014) How specificity and epidemiology drive the  
312 coevolution of static trait diversity in hosts and parasites. *Evolution* 68: 1594-1606. DOI  
313 10.1111/evo.12393.
- 314 Brodie III, E. D. & Brodie Jr, E. D. (1990) Tetrodotoxin resistance in garter snakes: an  
315 evolutionary response of predators to dangerous prey. *Evolution* 44: 651-659. DOI  
316 10.1111/j.1558-5646.1990.tb05945.x.
- 317 Brodie III, E. D. & Brodie Jr, E. D. (1999) Costs of exploiting poisonous prey: evolutionary  
318 trade-offs in a predator-prey arms race. *Evolution* 53: 626-631. DOI  
319 10.1111/j.1558-5646.1999.tb03798.x.
- 320 Brown, J. S. & Vincent, T. L. (1992) Organization of predator-prey communities as an  
321 evolutionary game. *Evolution* 46: 1269-1283. DOI 10.2307/2409936.
- 322 Calcagno, V., Dubosclard, M. & de Mazancourt, C. (2010) Rapid exploiter-victim coevolution:  
323 The race is not always to the swift. *The American Naturalist* 176: 198-211. DOI  
324 10.1086/653665.
- 325 Cortez, M. H. & Weitz, J. S. (2014) Coevolution can reverse predator–prey cycles. *Proceedings*  
326 *of the National Academy of Sciences of the United States of America* 111: 7486-7491.  
327 DOI 10.1073/pnas.1317693111.
- 328 Dalla, S. & Dobler, S. (2016) Gene duplications circumvent trade-offs in enzyme function: Insect  
329 adaptation to toxic host plants. *Evolution* 70: 2767-2777. DOI 10.1111/evo.13077.
- 330 Débarre, F., Nuismer, S. L. & Doebeli, M. (2014) Multidimensional (co)evolutionary stability.  
331 *The American Naturalist* 184: 158-171. DOI 10.1086/677137.
- 332 Dercole, F., Ferriere, R. & Rinaldi, S. (2010) Chaotic Red Queen coevolution in three-species  
333 food chains. *Proceedings of the Royal Society B: Biological Sciences* 277: 2321-2330.

- 334 DOI 10.1098/rspb.2010.0209.
- 335 Dieckmann, U., Marrow, P. & Law, R. (1995) Evolutionary cycling in predator-prey interactions:  
336 population dynamics and the Red Queen. *Journal of Theoretical Biology* 176: 91-102.  
337 DOI 10.1006/jtbi.1995.0179.
- 338 Doebeli, M. & Ispolatov, I. (2017) Diversity and coevolutionary dynamics in high-dimensional  
339 phenotype spaces. *The American Naturalist* 189: 105-120. DOI 10.1086/689891.
- 340 Fleischer, S. R., terHorst, C. P. & Li, J. (2018) Pick your trade-offs wisely: Predator-prey eco-evo  
341 dynamics are qualitatively different under different trade-offs. *Journal of Theoretical*  
342 *Biology* 456: 201-212. DOI 10.1016/j.jtbi.2018.08.013.
- 343 Flor, H. H. (1956) The complementary genic systems in flax and flax rust. *Advances in genetics*  
344 8: 29-54. DOI 10.1016/S0065-2660(08)60498-8.
- 345 Frank, S. A. (1994) Coevolutionary genetics of hosts and parasites with quantitative inheritance.  
346 *Evolutionary Ecology* 8: 74-94. DOI 10.1007/BF01237668.
- 347 Frank, S. A. (1996) Problems inferring the specificity of plant-pathogen genetics. *Evolutionary*  
348 *Ecology* 10: 323-325. DOI 10.1007/BF01237689.
- 349 Gavrillets, S. (1997) Coevolutionary chase in exploiter-victim systems with polygenic characters.  
350 *Journal of Theoretical Biology* 186: 527-534. DOI 10.1006/jtbi.1997.0426.
- 351 Gilman, R. T., Nuismer, S. L. & Jhwueng, D.-C. (2012) Coevolution in multidimensional trait  
352 space favours escape from parasites and pathogens. *Nature* 483: 328-330. DOI  
353 10.1038/nature10853.
- 354 Grosberg, R. K. & Hart, M. W. (2000) Mate selection and the evolution of highly polymorphic  
355 self/nonsel self recognition genes. *Science* 289: 2111-2114. DOI  
356 10.1126/science.289.5487.2111.
- 357 Hall, M. D., Bento, G. & Ebert, D. (2017) The evolutionary consequences of stepwise infection  
358 processes. *Trends in Ecology & Evolution* 32: 612-623. DOI 10.1016/j.tree.2017.05.009.
- 359 Herms, D. A. & Mattson, W. J. (1992) The dilemma of plants: to grow or defend. *The Quarterly*  
360 *Review of Biology* 67: 283-335. DOI 10.1086/417659.
- 361 Iwasa, Y., Pomiankowski, A. & Nee, S. (1991) The evolution of costly mate preferences II. The  
362 'handicap' principle. *Evolution* 45: 1431-1442. DOI 10.2307/2409890.
- 363 Khibnik, A. I. & Kondrashov, A. S. (1997) Three mechanisms of Red Queen dynamics.  
364 *Proceedings of the Royal Society B: Biological Sciences* 264: 1049-1056. DOI  
365 10.1098/rspb.1997.0145.

- 366 Kopp, M. & Gavrillets, S. (2006) Multilocus genetics and the coevolution of quantitative traits.  
367 Evolution 60: 1321-1336. DOI 10.1111/j.0014-3820.2006.tb01212.x.
- 368 Lande, R. (1976) Natural selection and random genetic drift in phenotypic evolution. Evolution  
369 30: 314-334. DOI 10.2307/2407703.
- 370 Marrow, P., Law, R. & Cannings, C. (1992) The coevolution of predator-prey interactions: ESSs  
371 and Red Queen dynamics. Proceedings of the Royal Society B: Biological Sciences 250:  
372 133-141. DOI 10.1098/rspb.1992.0141.
- 373 McPeck, M. A. (2017) Evolutionary Community Ecology. Princeton University Press, Princeton,  
374 NJ.
- 375 Mode, C. J. (1958) A mathematical model for the co-evolution of obligate parasites and their  
376 hosts. Evolution 12: 158-165. DOI 10.2307/2406026.
- 377 Mougi, A. (2012) Predator-prey coevolution driven by size selective predation can cause  
378 anti-synchronized and cryptic population dynamics. Theoretical Population Biology 81:  
379 113-118. DOI 10.1016/j.tpb.2011.12.005.
- 380 Mougi, A. & Iwasa, Y. (2010) Evolution towards oscillation or stability in a predator-prey system.  
381 Proceedings of the Royal Society B: Biological Sciences 277: 3163-3171. DOI  
382 10.1098/rspb.2010.0691.
- 383 Mougi, A. & Iwasa, Y. (2011) Unique coevolutionary dynamics in a predator-prey system.  
384 Journal of Theoretical Biology 277: 83-89. DOI 10.1016/j.jtbi.2011.02.015.
- 385 Northfield, T. D. & Ives, A. R. (2013) Coevolution and the effects of climate change on  
386 interacting species. Plos Biology 11: e1001685. DOI 10.1371/journal.pbio.1001685.
- 387 Nuismer, S. L. (2017) Introduction to Coevolutionary Theory. W. H. Freeman, New York, NY.
- 388 Nuismer, S. L., Doebeli, M. & Browning, D. (2005) The coevolutionary dynamics of antagonistic  
389 interactions mediated by quantitative traits with evolving variances. Evolution 59:  
390 2073-2082. DOI 10.1111/j.0014-3820.2005.tb00918.x.
- 391 Nuismer, S. L., Ridenhour, B. J. & Oswald, B. P. (2007) Antagonistic coevolution mediated by  
392 phenotypic differences between quantitative traits. Evolution 61: 1823-1834. DOI  
393 10.1111/j.1558-5646.2007.00158.x.
- 394 Otto, S. P. & Lenormand, T. (2002) Resolving the paradox of sex and recombination. Nature  
395 Reviews Genetics 3: 252-261. DOI 10.1038/nrg761.
- 396 Parker, M. A. (1994) Pathogens and sex in plants. Evolutionary Ecology 8: 560-584. DOI  
397 10.1007/BF01238258.

- 398 Saloniemi, I. (1993) A coevolutionary predator-prey model with quantitative characters. The  
399 American Naturalist 141: 880-896. DOI 10.1086/285514.
- 400 Sasaki, A. & Godfray, H. C. J. (1999) A model for the coevolution of resistance and virulence in  
401 coupled host-parasitoid interactions. Proceedings of the Royal Society B: Biological  
402 Sciences 266: 455-463. DOI 10.1098/rspb.1999.0659.
- 403 Seger, J. (1988) Dynamics of some simple host-parasite models with more than two genotypes in  
404 each species. Philosophical Transactions of the Royal Society B: Biological Sciences 319:  
405 541-555. DOI 10.1098/rstb.1988.0064.
- 406 Spottiswoode, C. N. & Stevens, M. (2012) Host-parasite arms races and rapid changes in bird egg  
407 appearance. The American Naturalist 179: 633-648. DOI 10.1086/665031.
- 408 Thompson, J. N. (2005) The Geographic Mosaic of Coevolution. The University of Chicago  
409 Press, Chicago, IL.
- 410 Tien, R. J. & Ellner, S. P. (2012) Variable cost of prey defense and coevolution in predator-prey  
411 systems. Ecological Monographs 82: 491-504. DOI 10.1890/11-2168.1.
- 412 van Velzen, E. & Gaedke, U. (2017) Disentangling eco-evolutionary dynamics of predator-prey  
413 coevolution: the case of antiphase cycles. Scientific reports 7: 17125. DOI  
414 10.1038/s41598-017-17019-4.
- 415 Yamamichi, M. & Ellner, S. P. (2016) Antagonistic coevolution between quantitative and  
416 Mendelian traits. Proceedings of the Royal Society B: Biological Sciences 283: 20152926.  
417 DOI 10.1098/rspb.2015.2926.
- 418 Yamamichi, M. & Miner, B. E. (2015) Indirect evolutionary rescue: prey adapts, predator avoids  
419 extinction. Evolutionary Applications 8: 787-795. DOI 10.1111/eva.12295.
- 420

421 **FIGURE LEGENDS**

422 **FIGURE 1.** Interaction frameworks and genetic architectures in coevolution models. (a)

423 Matching allele (MA) is a matching interaction in Mendelian traits. Victims and exploiters are

424 haploid and their genotypes are represented by 1 and 0 at a particular locus. Dark shading

425 indicates greater exploitation success. (b) The matching interaction is a MA interaction in

426 quantitative traits. Exploitation success is maximized when the trait difference is zero. (c)

427 Gene-for-gene (GFG) is a difference interaction in Mendelian traits. Here 1 and 0 indicate the

428 presence and absence, respectively, of defense/exploitation alleles. (d) The difference interaction

429 is a GFG interaction in quantitative traits. Exploitation success is increased by larger exploiter

430 trait values and by smaller victim trait values.

431

432 **FIGURE 2.** (a) An example of exploitation matrix in a Mendelian GFG model with two loci

433 (Ashby and Boots, 2017). The region surrounded by a dashed white line shows that the MA

434 interaction arises from the GFG framework. Victims and exploiters are haploid and their

435 genotypes are represented by 1 and 0 at a locus, and they indicate the presence and absence,

436 respectively, of defense/exploitation alleles. Darker shading indicates greater exploitation success



437 and arrows indicate greater costs. (b) Exploitation success as a function of both trait differences  
438 between exploiters and victims ( $y_i - x_i$ ) in a quantitative difference model with two traits  
439 (Equation 1).

440

441 **FIGURE 3.** Coevolutionary dynamics of two quantitative traits with difference interactions. (a,  
442 b) Fitness landscapes of victims (a) and exploiters (b) when the exploiter genetic variance is large  
443 enough and the system converges to a stable equilibrium. (a) A contour plot of fitness ( $m_x$ ) and a  
444 vector field of fitness gradients for the victim traits when the exploiter traits are at the equilibrium  
445 trait value (the red point in b). (b) A contour plot of fitness ( $m_y$ ) and a vector field of fitness  
446 gradients for the exploiter traits when the victim traits are at the equilibrium trait value (the blue  
447 point in a). Parameter values are  $\rho_{xi} = 0.07$ ,  $\rho_{yi} = 2$ ,  $x_{10} = x_{20} = 0.2$ ,  $a_0 = r_0 = c_0 = \theta_i = v_{jii} = 1$ ,  $s_i =$   
448  $0.01$ , and  $v_{j12} = 0$  ( $i = 1, 2, j = x, y$ ). (c-f) Coevolutionary cycles when the victim genetic variance  
449 is much larger than exploiter genetic variance ( $v_{xii} \gg v_{yii}$ ). (c) Numerical solutions of the four  
450 traits. (d) Numerical solutions of the functions (Equation 2) representing costs of  
451 defense/exploitation (note that lower values indicate higher costs). (e, f) Coevolutionary cycles of  
452 victims (e) and exploiters (f). Parameter values are the same as (a) and (b) except for  $v_{xii} = 1$  and

453  $v_{yii} = 0.01$  ( $i = 1, 2$ ). Note that  $c$  is negative in gray regions in (b) and (f).

454 **Figure 1.**

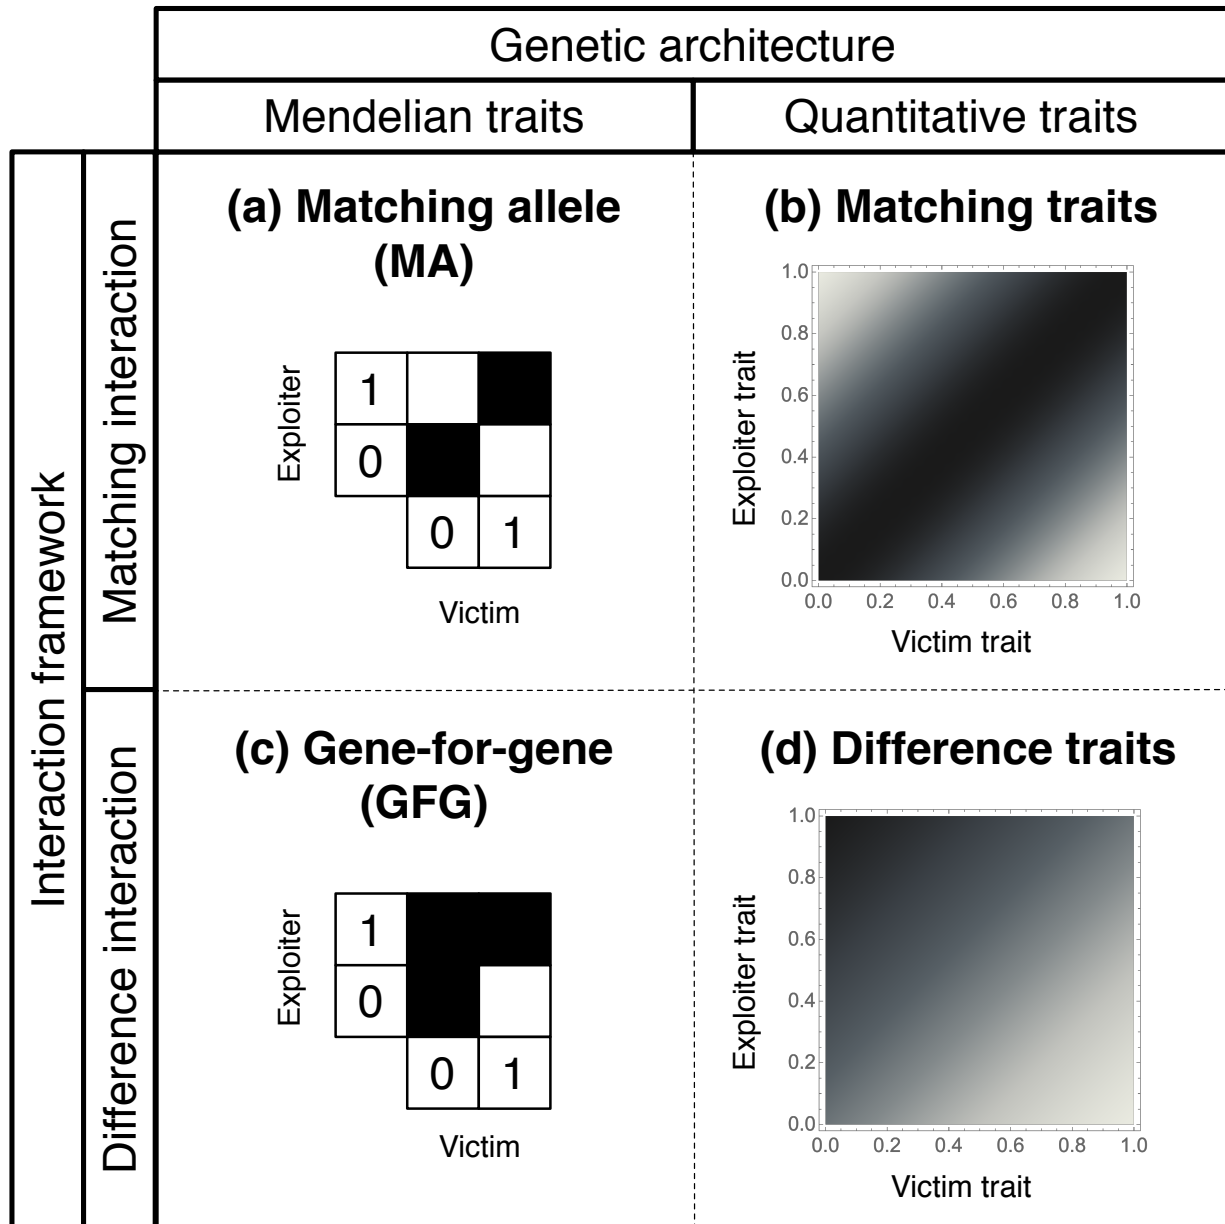

455

456

457 **Figure 2.**

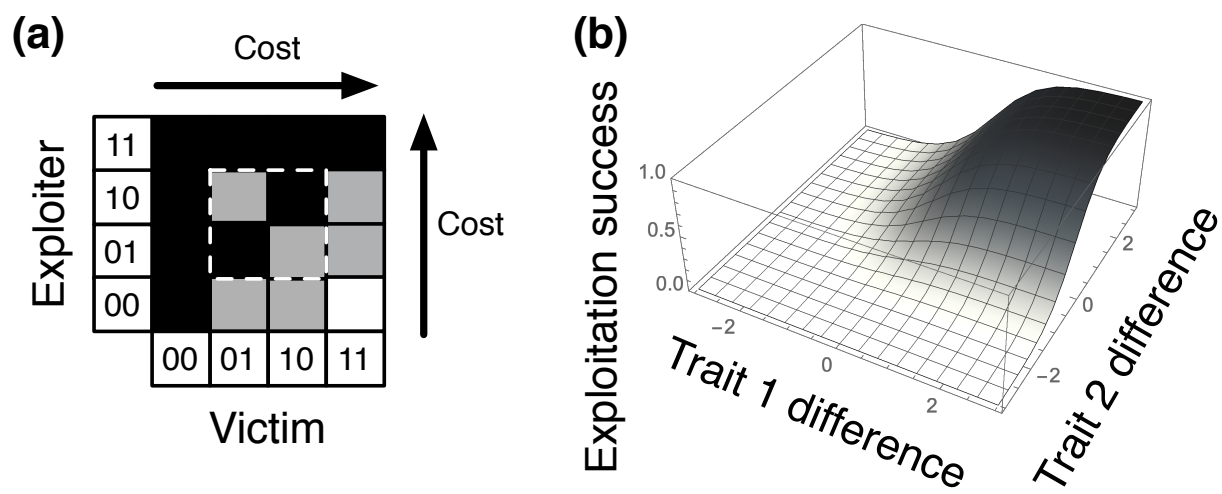

458

459 **Figure 3.**

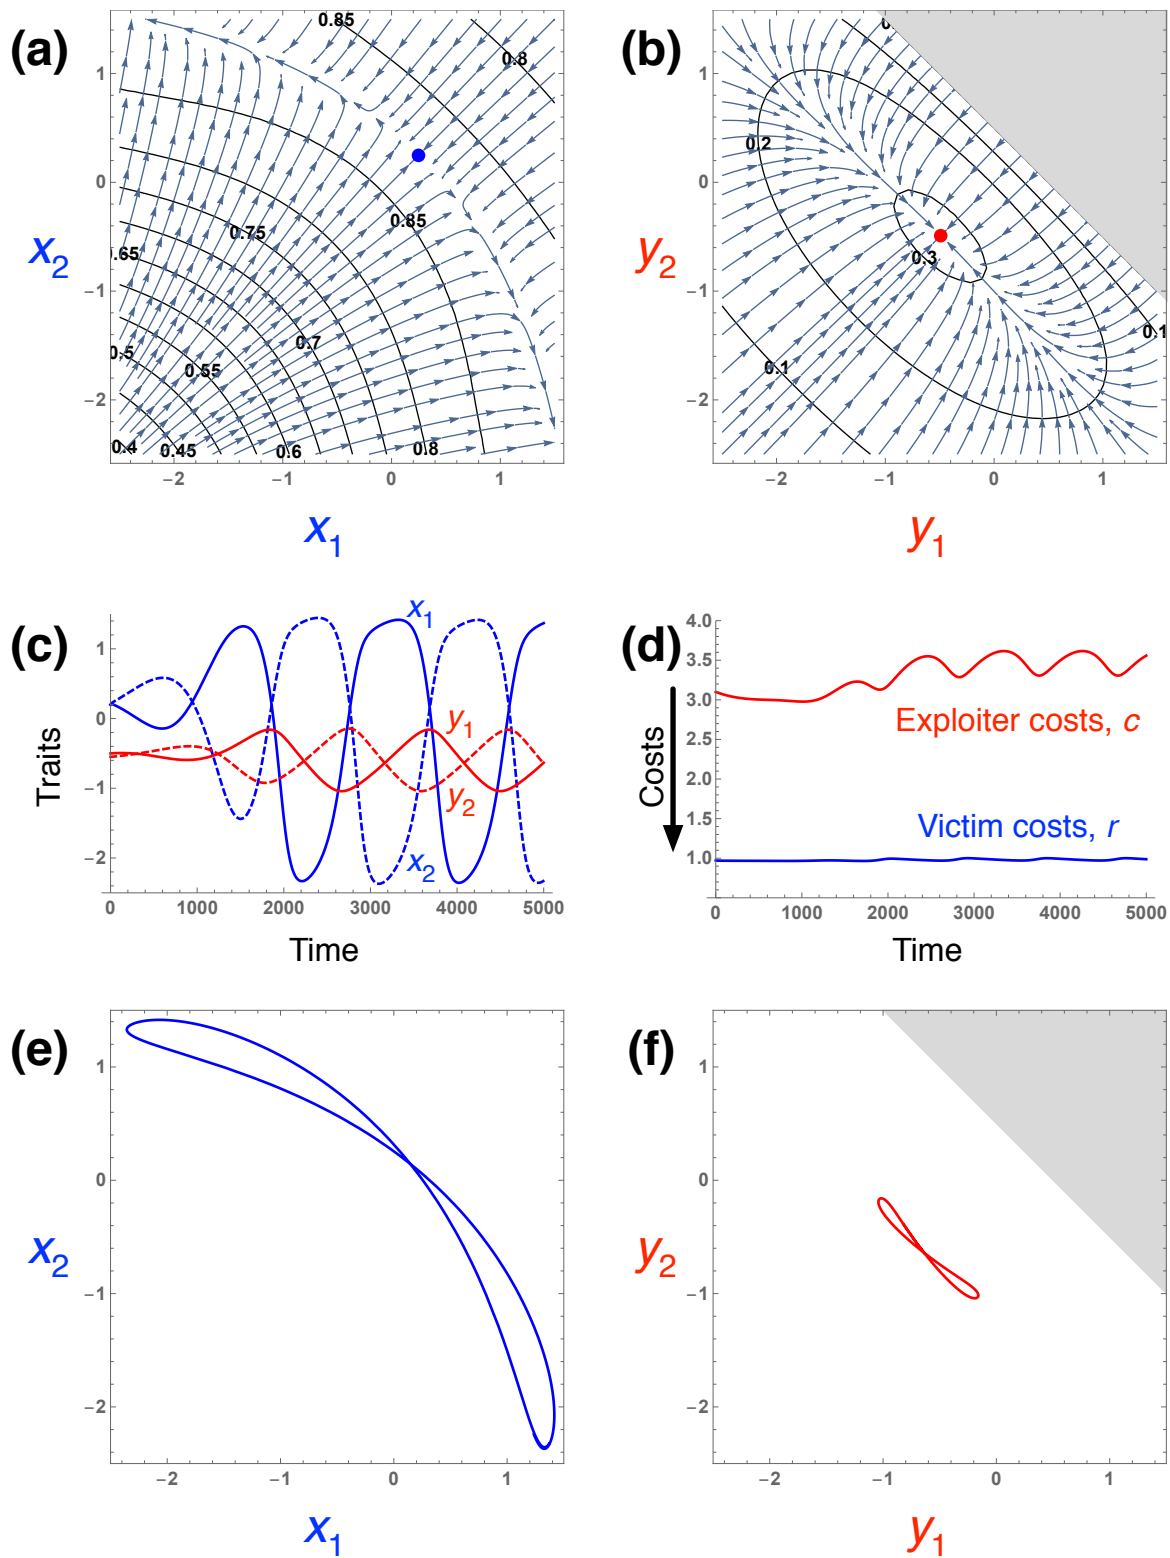

460
